# Supplementary material for: “We Just Want to Feel at Peace”: A Qualitative Exploration of Comfort Care Needs in Geriatric Palliative Patients
Source: Research Square preprint supplement (doi:10.21203/rs.3.rs-8241914/v1), 2026-01-12
Supplement: Supplementary file 1 [file c5679cdb02fac50fcddc10f1.docx]

| **Dimension** | **Medical staff, social workers** | **Minder** | **Patients** |
| --- | --- | --- | --- |
| **Comfortable**  **and**  **meaningful** | 1. What are the main groups of people you come into contact with most often in palliative care? What does your work mainly involve?  2.Based on your work experience, what do you think is most important for elderly people in palliative care?  3. Drawing on your professional background, how would you describe your understanding of comfort in palliative care for the terminally ill, or what do you think comfort means from your perspective? | 1. How long have you been caring for the elderly? Can you talk about your feelings about caring for the elderly?  2. What do you think is most important for the elderly?  3. From the elderly person's perspective, what do you think makes them feel comfortable? What are some things that currently make the elderly feel uncomfortable? | 1. How long have you been staying here, and how do you feel?  2. What do you think is the most comfortable state for you at present? From your perspective, what are your thoughts on comfort?  3. Based on your current physical condition and your feelings about treatment and care, what are your needs or thoughts regarding daily care, hospital services, or treatment and nursing care? |
| **Comfortable environment** | 1.How do you feel about the environment in your palliative care ward? How do the elderly residents feel about and respond to the current environment?  2.What requirements do you think palliative care services for the elderly have in terms of the environment? What kind of environment would make the elderly feel comfortable? What would you do to make the ward more comfortable for the elderly? Are there any areas that need improvement? | 1. What kind of environment do you think is most suitable for the elderly at this stage to make them feel comfortable?  2. Based on your understanding of the elderly, what kind of environment do you think they would like? What do you think can be done to increase the comfort of the environment? | 1.How do you feel about the environment here? Is there anything that makes you feel comfortable and at ease, and what areas need the most improvement?  2. If conditions allow, what kind of environment would you most like to have at this stage? What conditions would that include? |
| **physiological comfort** | 1.What do you consider to be physical comfort? What aspects need to be focused on?  2. From the perspective of the elderly and their families, what do you think physical comfort means to them?  3. In your daily interactions with the elderly, what do you think is the biggest challenge to achieving physical comfort? | 1. Apart from environmental conditions, how would you describe the elderly person's current physical condition? Which physical issues do you think most affect the elderly person's comfort?  2. What do you think can be done to make the elderly person feel more comfortable physically? | 1. How are you feeling physically at the moment? Are there any areas of discomfort, and which symptoms are causing you the most distress?  2. How would you like to address your physical discomfort? For example, what can healthcare professionals, social workers, and caregivers do to assist you? |
| **Psychological and**  **mental**  **comfort** | 1. Based on your work experience, from the perspective of the elderly and their families, what do you think their reactions to psychological and mental comfort are? What are their requirements for achieving psychological and mental comfort? | 1. What changes have you noticed in the elderly person's mental and emotional state? How do you think you can make them feel more comfortable emotionally?  2. How do you think medical staff, social workers, and others can improve the elderly person's mental and emotional comfort?  3. Has the elderly person mentioned their thoughts on death at this stage? What are your thoughts on this? | 1. In addition to physical comfort, how do you understand psychological and spiritual comfort?  2. What would you like your family, relatives, friends, medical staff, social workers, etc. to do? |
| **Social**  **and**  **cultural comfort** | 1. How do you understand sociocultural comfort in palliative care for the elderly?  2. In order to improve the sociocultural comfort of terminally ill elderly people, what care measures do you think are currently effective? Which ones need improvement? | 1. You have been taking care of the elderly for so long. Have you noticed if there is anything on their minds?  2. Are there any particular wishes that the elderly would like to fulfill at this stage?  3. How do you think the elderly understand social and cultural comfort? | 1. What is your understanding of social and cultural comfort? What makes you feel comfortable? What makes you feel uncomfortable?  2. How do you feel about your current situation? Is there anything in particular you would like to achieve? |
